# Supplementary material for: Ki-67 assessment of pancreatic neuroendocrine neoplasms: Systematic review and meta-analysis of manual vs. digital pathology scoring
Source: PubMed Central journal article supplement (PMC9174054; doi:10.1038/s41379-022-01055-1), 2022-03-05

**Supplementary Figure 1. PRISMA checklist for this systematic review and meta-analysis.**

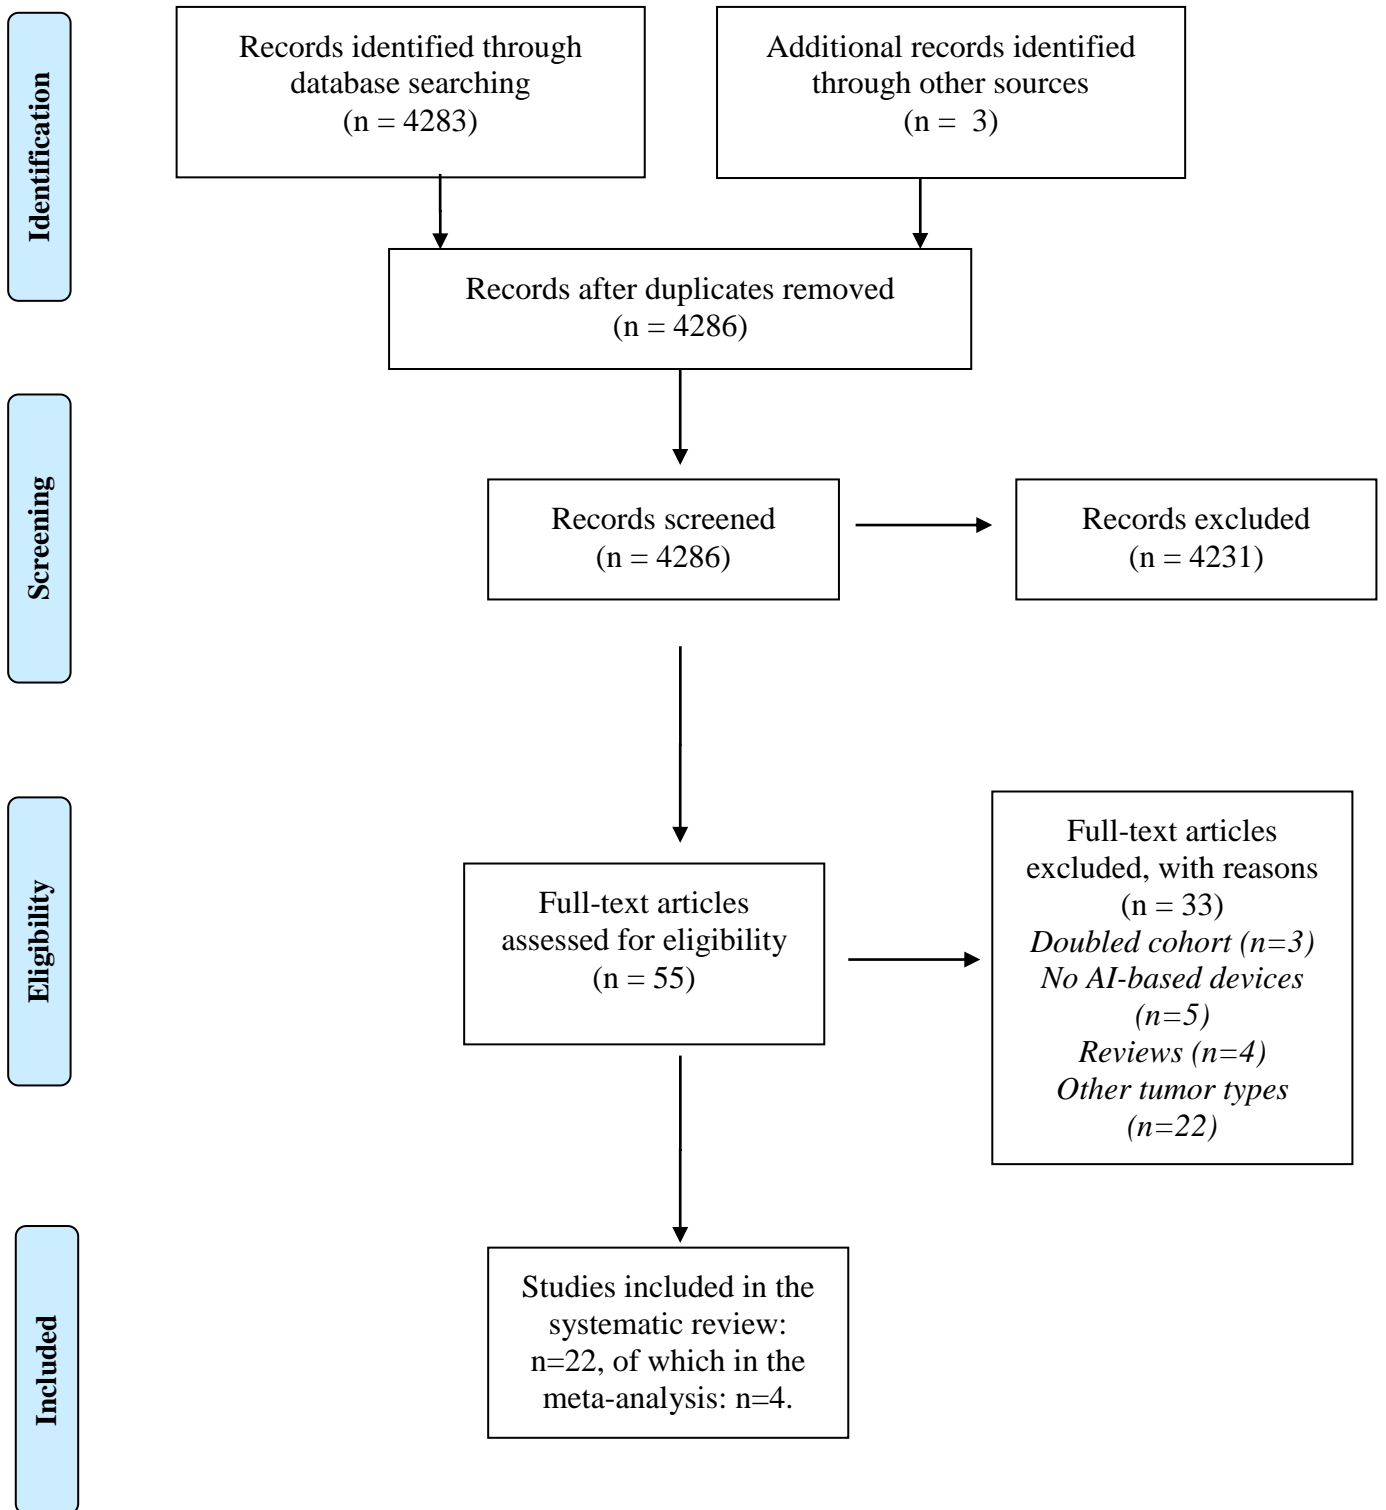

Supplement: 41379_2022_1055_MOESM1_ESM.pdf [file 41379_2022_1055_MOESM1_ESM.pdf]
